# Supplementary material for: SARS-CoV-2 Mpro inhibitors and activity-based probes for patient-sample imaging
Source: Springer Nature journal article supplement (doi:10.1038/s41589-020-00689-z), 2020-10-22
Supplement: 41589_2020_689_MOESM32_ESM.mol [file 41589_2020_689_MOESM32_ESM.mol]

nchembio.A200611491B-comp11.mol
  ChemDraw10022014312D

143142  0  0  1  0  0  0  0  0999 V2000
   -7.2274    0.7604    0.0000 C   0  0  0  0  0  0  0  0  0  0  0  0
   -6.5105    1.1744    0.0000 C   0  0  0  0  0  0  0  0  0  0  0  0
   -5.7935    0.7604    0.0000 N   0  0  0  0  0  0  0  0  0  0  0  0
   -5.0766    1.1744    0.0000 C   0  0  0  0  0  0  0  0  0  0  0  0
   -4.3596    0.7604    0.0000 C   0  0  0  0  0  0  0  0  0  0  0  0
   -3.6427    1.1744    0.0000 N   0  0  0  0  0  0  0  0  0  0  0  0
   -2.9257    0.7604    0.0000 C   0  0  0  0  0  0  0  0  0  0  0  0
   -2.2087    1.1744    0.0000 C   0  0  0  0  0  0  0  0  0  0  0  0
   -1.4918    0.7604    0.0000 N   0  0  0  0  0  0  0  0  0  0  0  0
   -0.7748    1.1744    0.0000 C   0  0  0  0  0  0  0  0  0  0  0  0
   -0.0579    0.7604    0.0000 C   0  0  0  0  0  0  0  0  0  0  0  0
    0.6591    1.1744    0.0000 N   0  0  0  0  0  0  0  0  0  0  0  0
    1.3761    0.7604    0.0000 C   0  0  0  0  0  0  0  0  0  0  0  0
    2.0930    1.1744    0.0000 C   0  0  0  0  0  0  0  0  0  0  0  0
    2.8100    0.7604    0.0000 N   0  0  0  0  0  0  0  0  0  0  0  0
    3.5269    1.1744    0.0000 C   0  0  0  0  0  0  0  0  0  0  0  0
    4.2439    0.7604    0.0000 C   0  0  0  0  0  0  0  0  0  0  0  0
    4.9609    1.1744    0.0000 N   0  0  0  0  0  0  0  0  0  0  0  0
    5.6778    0.7604    0.0000 C   0  0  0  0  0  0  0  0  0  0  0  0
    6.3948    1.1744    0.0000 C   0  0  0  0  0  0  0  0  0  0  0  0
    7.1117    0.7604    0.0000 N   0  0  0  0  0  0  0  0  0  0  0  0
    7.8287    1.1744    0.0000 C   0  0  0  0  0  0  0  0  0  0  0  0
    8.5456    0.7604    0.0000 C   0  0  0  0  0  0  0  0  0  0  0  0
    9.2626    1.1744    0.0000 N   0  0  0  0  0  0  0  0  0  0  0  0
    9.9796    0.7604    0.0000 C   0  0  0  0  0  0  0  0  0  0  0  0
   10.6965    1.1744    0.0000 C   0  0  0  0  0  0  0  0  0  0  0  0
   11.4135    0.7604    0.0000 N   0  0  0  0  0  0  0  0  0  0  0  0
   12.1304    1.1744    0.0000 C   0  0  0  0  0  0  0  0  0  0  0  0
   12.8474    0.7604    0.0000 C   0  0  0  0  0  0  0  0  0  0  0  0
   13.5644    1.1744    0.0000 N   0  0  0  0  0  0  0  0  0  0  0  0
   -7.9444    1.1744    0.0000 N   0  0  0  0  0  0  0  0  0  0  0  0
   -8.6614    0.7604    0.0000 C   0  0  0  0  0  0  0  0  0  0  0  0
   -9.3783    1.1744    0.0000 C   0  0  0  0  0  0  0  0  0  0  0  0
   12.8474   -0.0646    0.0000 O   0  0  0  0  0  0  0  0  0  0  0  0
   12.1304    1.9994    0.0000 C   0  0  0  0  0  0  0  0  0  0  0  0
   12.8474    2.4133    0.0000 C   0  0  0  0  0  0  0  0  0  0  0  0
   12.8474    3.2383    0.0000 C   0  0  0  0  0  0  0  0  0  0  0  0
   13.5619    3.6508    0.0000 C   0  0  0  0  0  0  0  0  0  0  0  0
   13.5619    4.4758    0.0000 N   0  3  0  0  0  0  0  0  0  0  0  0
   10.6965    1.9994    0.0000 O   0  0  0  0  0  0  0  0  0  0  0  0
    9.9796   -0.0646    0.0000 C   0  0  0  0  0  0  0  0  0  0  0  0
   10.6940   -0.4771    0.0000 C   0  0  0  0  0  0  0  0  0  0  0  0
   10.6940   -1.3021    0.0000 C   0  0  0  0  0  0  0  0  0  0  0  0
   11.4085   -1.7146    0.0000 C   0  0  0  0  0  0  0  0  0  0  0  0
   11.4085   -2.5396    0.0000 N   0  0  0  0  0  0  0  0  0  0  0  0
   12.1230   -2.9521    0.0000 C   0  0  0  0  0  0  0  0  0  0  0  0
   12.1230   -3.7799    0.0000 C   0  0  0  0  0  0  0  0  0  0  0  0
   12.8399   -4.1939    0.0000 C   0  0  0  0  0  0  0  0  0  0  0  0
   13.5569   -3.7799    0.0000 C   0  0  0  0  0  0  0  0  0  0  0  0
   13.5569   -2.9521    0.0000 C   0  0  0  0  0  0  0  0  0  0  0  0
   12.8399   -2.5381    0.0000 C   0  0  0  0  0  0  0  0  0  0  0  0
    8.5456   -0.0646    0.0000 O   0  0  0  0  0  0  0  0  0  0  0  0
    7.8287    1.9994    0.0000 C   0  0  0  0  0  0  0  0  0  0  0  0
    8.5432    2.4119    0.0000 C   0  0  0  0  0  0  0  0  0  0  0  0
    8.5432    3.2397    0.0000 C   0  0  0  0  0  0  0  0  0  0  0  0
    9.2576    3.6522    0.0000 N   0  0  0  0  0  0  0  0  0  0  0  0
    9.2576    4.4801    0.0000 C   0  0  0  0  0  0  0  0  0  0  0  0
    9.9721    4.8926    0.0000 N   0  0  0  0  0  0  0  0  0  0  0  0
    8.5432    4.8926    0.0000 N   0  3  0  0  0  0  0  0  0  0  0  0
    6.3948    1.9994    0.0000 O   0  0  0  0  0  0  0  0  0  0  0  0
    5.6778   -0.0646    0.0000 C   0  0  0  0  0  0  0  0  0  0  0  0
    6.2632   -0.6500    0.0000 C   0  0  0  0  0  0  0  0  0  0  0  0
    6.0489   -1.4496    0.0000 C   0  0  0  0  0  0  0  0  0  0  0  0
    6.6343   -2.0350    0.0000 C   0  0  0  0  0  0  0  0  0  0  0  0
    7.4340   -1.8208    0.0000 C   0  0  0  0  0  0  0  0  0  0  0  0
    7.6483   -1.0211    0.0000 C   0  0  0  0  0  0  0  0  0  0  0  0
    7.0629   -0.4357    0.0000 C   0  0  0  0  0  0  0  0  0  0  0  0
    4.2439   -0.0646    0.0000 O   0  0  0  0  0  0  0  0  0  0  0  0
    2.0930    1.9994    0.0000 O   0  0  0  0  0  0  0  0  0  0  0  0
    1.3761   -0.0646    0.0000 C   0  0  0  0  0  0  0  0  0  0  0  0
    2.0930   -0.4785    0.0000 O   0  0  0  0  0  0  0  0  0  0  0  0
   -0.0579   -0.0646    0.0000 O   0  0  0  0  0  0  0  0  0  0  0  0
   -0.7748    1.9994    0.0000 C   0  0  0  0  0  0  0  0  0  0  0  0
   -0.0579    2.4133    0.0000 C   0  0  0  0  0  0  0  0  0  0  0  0
   -0.0579    3.2412    0.0000 C   0  0  0  0  0  0  0  0  0  0  0  0
    0.6566    3.6537    0.0000 O   0  0  0  0  0  0  0  0  0  0  0  0
   -0.7723    3.6537    0.0000 N   0  0  0  0  0  0  0  0  0  0  0  0
   -2.2087    1.9994    0.0000 O   0  0  0  0  0  0  0  0  0  0  0  0
   -2.9257   -0.0646    0.0000 C   0  0  0  0  0  0  0  0  0  0  0  0
   -2.2112   -0.4771    0.0000 C   0  0  0  0  0  0  0  0  0  0  0  0
   -2.2112   -1.3021    0.0000 C   0  0  0  0  0  0  0  0  0  0  0  0
   -1.4116   -0.2628    0.0000 C   0  0  0  0  0  0  0  0  0  0  0  0
   -4.3596   -0.0646    0.0000 O   0  0  0  0  0  0  0  0  0  0  0  0
   -5.0766    1.9994    0.0000 C   0  0  0  0  0  0  0  0  0  0  0  0
   -6.5105    1.9994    0.0000 O   0  0  0  0  0  0  0  0  0  0  0  0
   -7.2274   -0.0646    0.0000 C   0  0  0  0  0  0  0  0  0  0  0  0
   -8.6614   -0.0646    0.0000 O   0  0  0  0  0  0  0  0  0  0  0  0
  -10.0928    0.7619    0.0000 N   0  0  0  0  0  0  0  0  0  0  0  0
  -10.8073    1.1744    0.0000 C   0  0  0  0  0  0  0  0  0  0  0  0
  -11.5217    0.7619    0.0000 C   0  0  0  0  0  0  0  0  0  0  0  0
  -10.8073    1.9994    0.0000 O   0  0  0  0  0  0  0  0  0  0  0  0
  -11.5217   -0.0631    0.0000 C   0  0  0  0  0  0  0  0  0  0  0  0
  -12.2387   -0.4771    0.0000 C   0  0  0  0  0  0  0  0  0  0  0  0
  -12.2387   -1.3049    0.0000 C   0  0  0  0  0  0  0  0  0  0  0  0
  -11.5217   -1.7189    0.0000 O   0  0  0  0  0  0  0  0  0  0  0  0
  -10.8048   -1.3049    0.0000 C   0  0  0  0  0  0  0  0  0  0  0  0
  -10.8048   -0.4771    0.0000 C   0  0  0  0  0  0  0  0  0  0  0  0
  -10.0903   -1.7174    0.0000 O   0  0  0  0  0  0  0  0  0  0  0  0
  -12.9556   -0.0631    0.0000 C   0  0  0  0  0  0  0  0  0  0  0  0
  -13.6726   -0.4771    0.0000 C   0  0  0  0  0  0  0  0  0  0  0  0
  -13.6726   -1.3049    0.0000 C   0  0  0  0  0  0  0  0  0  0  0  0
  -12.9556   -1.7189    0.0000 C   0  0  0  0  0  0  0  0  0  0  0  0
  -14.3871   -1.7174    0.0000 N   0  3  0  0  0  0  0  0  0  0  0  0
   -6.5130   -0.4771    0.0000 C   0  0  0  0  0  0  0  0  0  0  0  0
   -4.3621    2.4119    0.0000 C   0  0  0  0  0  0  0  0  0  0  0  0
   -4.3621    3.2369    0.0000 C   0  0  0  0  0  0  0  0  0  0  0  0
   -3.6476    3.6494    0.0000 C   0  0  0  0  0  0  0  0  0  0  0  0
   -3.6476    4.4744    0.0000 N   0  3  0  0  0  0  0  0  0  0  0  0
   -7.9419   -0.4771    0.0000 C   0  0  0  0  0  0  0  0  0  0  0  0
   12.8399   -1.7131    0.0000 N   0  3  0  0  0  0  0  0  0  0  0  0
   13.5544   -1.3006    0.0000 O   0  0  0  0  0  0  0  0  0  0  0  0
   12.1255   -1.3006    0.0000 O   0  5  0  0  0  0  0  0  0  0  0  0
   14.2714   -4.1924    0.0000 N   0  3  0  0  0  0  0  0  0  0  0  0
   14.2714   -5.0174    0.0000 O   0  0  0  0  0  0  0  0  0  0  0  0
   14.9858   -3.7799    0.0000 O   0  5  0  0  0  0  0  0  0  0  0  0
    6.1245    3.6346    0.0000 C   0  0  0  0  0  0  0  0  0  0  0  0
    6.8415    4.0485    0.0000 C   0  0  0  0  0  0  0  0  0  0  0  0
    6.8415    4.8735    0.0000 O   0  5  0  0  0  0  0  0  0  0  0  0
    7.5560    3.6360    0.0000 O   0  0  0  0  0  0  0  0  0  0  0  0
    6.1245    2.8096    0.0000 F   0  0  0  0  0  0  0  0  0  0  0  0
    5.4101    4.0471    0.0000 F   0  0  0  0  0  0  0  0  0  0  0  0
    5.4076    3.2207    0.0000 F   0  0  0  0  0  0  0  0  0  0  0  0
  -16.0235   -0.2457    0.0000 C   0  0  0  0  0  0  0  0  0  0  0  0
  -15.3066    0.1683    0.0000 C   0  0  0  0  0  0  0  0  0  0  0  0
  -15.3066    0.9933    0.0000 O   0  5  0  0  0  0  0  0  0  0  0  0
  -14.5921   -0.2442    0.0000 O   0  0  0  0  0  0  0  0  0  0  0  0
  -16.0235   -1.0707    0.0000 F   0  0  0  0  0  0  0  0  0  0  0  0
  -16.7380    0.1668    0.0000 F   0  0  0  0  0  0  0  0  0  0  0  0
  -16.7405   -0.6596    0.0000 F   0  0  0  0  0  0  0  0  0  0  0  0
   15.3090    3.0457    0.0000 C   0  0  0  0  0  0  0  0  0  0  0  0
   16.0260    3.4596    0.0000 C   0  0  0  0  0  0  0  0  0  0  0  0
   16.0260    4.2846    0.0000 O   0  5  0  0  0  0  0  0  0  0  0  0
   16.7405    3.0471    0.0000 O   0  0  0  0  0  0  0  0  0  0  0  0
   15.3090    2.2207    0.0000 F   0  0  0  0  0  0  0  0  0  0  0  0
   14.5946    3.4582    0.0000 F   0  0  0  0  0  0  0  0  0  0  0  0
   14.5921    2.6317    0.0000 F   0  0  0  0  0  0  0  0  0  0  0  0
   -6.0059    3.7785    0.0000 C   0  0  0  0  0  0  0  0  0  0  0  0
   -5.2890    4.1924    0.0000 C   0  0  0  0  0  0  0  0  0  0  0  0
   -5.2890    5.0174    0.0000 O   0  5  0  0  0  0  0  0  0  0  0  0
   -4.5745    3.7799    0.0000 O   0  0  0  0  0  0  0  0  0  0  0  0
   -6.0059    2.9535    0.0000 F   0  0  0  0  0  0  0  0  0  0  0  0
   -6.7204    4.1910    0.0000 F   0  0  0  0  0  0  0  0  0  0  0  0
   -6.7229    3.3646    0.0000 F   0  0  0  0  0  0  0  0  0  0  0  0
 51110  1  0      
110111  2  0      
110112  1  0      
 49113  1  0      
113114  2  0      
113115  1  0      
  1  2  1  0      
  2  3  1  0      
  3  4  1  0      
  4  5  1  0      
  5  6  1  0      
  6  7  1  0      
  7  8  1  0      
  8  9  1  0      
  9 10  1  0      
 10 11  1  0      
 11 12  1  0      
 12 13  1  0      
 13 14  1  0      
 14 15  1  0      
 15 16  1  0      
 16 17  1  0      
 17 18  1  0      
 18 19  1  0      
 19 20  1  0      
 20 21  1  0      
 21 22  1  0      
 22 23  1  0      
 23 24  1  0      
 24 25  1  0      
 25 26  1  0      
 26 27  1  0      
 27 28  1  0      
 28 29  1  0      
 29 30  1  0      
  1 31  1  0      
 31 32  1  0      
 32 33  1  0      
 29 34  2  0      
 28 35  1  1      
 35 36  1  0      
 36 37  1  0      
 37 38  1  0      
 38 39  1  0      
 26 40  2  0      
 25 41  1  6      
 41 42  1  0      
 42 43  1  0      
 43 44  1  0      
 44 45  1  0      
 45 46  1  0      
 46 47  2  0      
 47 48  1  0      
 48 49  2  0      
 49 50  1  0      
 50 51  2  0      
 51 46  1  0      
 23 52  2  0      
 22 53  1  1      
 53 54  1  0      
 54 55  1  0      
 55 56  1  0      
 56 57  1  0      
 57 58  2  0      
 57 59  1  0      
 20 60  2  0      
 19 61  1  6      
 61 62  1  0      
 62 63  2  0      
 63 64  1  0      
 64 65  2  0      
 65 66  1  0      
 66 67  2  0      
 67 62  1  0      
 17 68  2  0      
 14 69  2  0      
 13 70  1  6      
 70 71  1  0      
 11 72  2  0      
 10 73  1  1      
 73 74  1  0      
 74 75  1  0      
 75 76  2  0      
 75 77  1  0      
  8 78  2  0      
  7 79  1  6      
 79 80  1  0      
 80 81  1  0      
 80 82  1  0      
  5 83  2  0      
  4 84  1  1      
  2 85  2  0      
  1 86  1  6      
 32 87  2  0      
 33 88  1  0      
 88 89  1  0      
 89 90  1  0      
 89 91  2  0      
 90 92  1  0      
 92 93  1  0      
 93 94  2  0      
 94 95  1  0      
 95 96  1  0      
 96 97  1  0      
 97 92  2  0      
 96 98  2  0      
 93 99  1  0      
 99100  2  0      
100101  1  0      
101102  2  0      
102 94  1  0      
101103  1  0      
 86104  1  0      
 84105  1  0      
105106  1  0      
106107  1  0      
107108  1  0      
 86109  1  0      
116117  1  0      
117118  1  0      
117119  2  0      
116120  1  0      
116121  1  0      
116122  1  0      
123124  1  0      
124125  1  0      
124126  2  0      
123127  1  0      
123128  1  0      
123129  1  0      
130131  1  0      
131132  1  0      
131133  2  0      
130134  1  0      
130135  1  0      
130136  1  0      
137138  1  0      
138139  1  0      
138140  2  0      
137141  1  0      
137142  1  0      
137143  1  0      
M  CHG  8  39   1  59   1 103   1 108   1 110   1 112  -1 113   1 115  -1
M  CHG  4 118  -1 125  -1 132  -1 139  -1
M  STY  1   1 SUP
M  SLB  1   1   1
M  SAL   1  3 110 111 112
M  SBL   1  1   1
M  SMT   1 NO2
M  SBV   1   1    0.0000   -0.8250
M  STY  1   2 SUP
M  SLB  1   2   2
M  SAL   2  3 113 114 115
M  SBL   2  1   4
M  SMT   2 NO2
M  SBV   2   4   -0.7145    0.4125
M  END
